# Supplementary material
Source: Springer Nature journal article supplement (https://www.springermedizin.de/resource/supplementary/12885_2008_1567_MOESM1_ESM.pdf/9472340)
Supplement: MOESM1 [file 9472340]

A. Hep 3B control

B. Ezrin

C. Y353 mutant

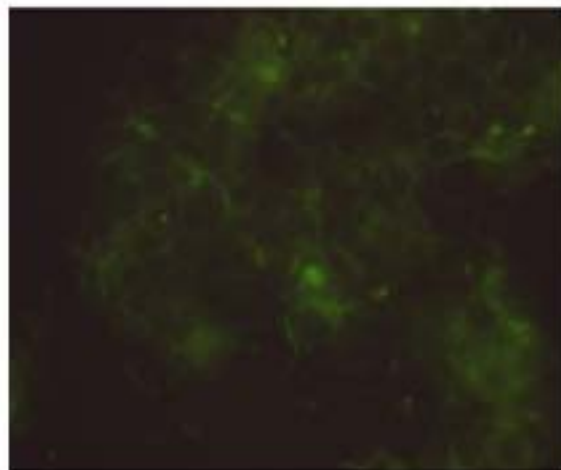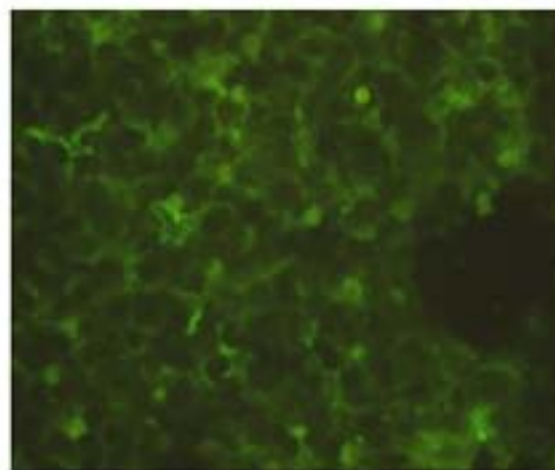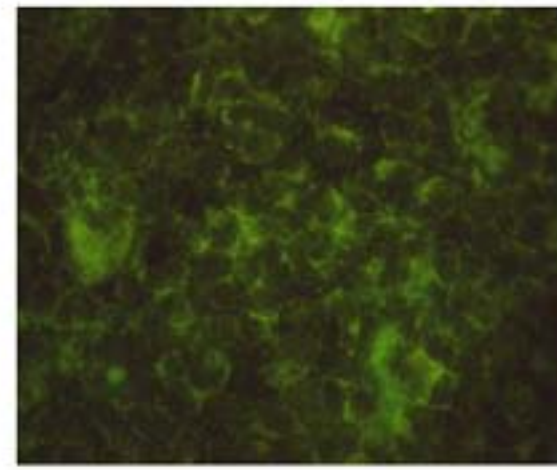

Western blot analysis of ezrin-vsvg expressed in Hep 3B cells

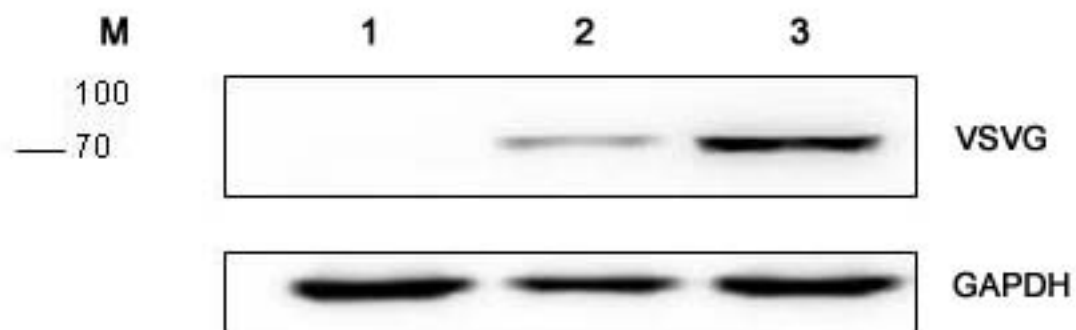

Lane 1: Hep 3 B

Lane 2: Hep 3B-Ezrin-vsvg

Lane 3: Hep 3B-y353-vsvg

Loading total protein:50ug

Exposed 15 mins
